# Supplementary material for: An Integrated Approach Including CRISPR/Cas9-Mediated Nanopore Sequencing, Mate Pair Sequencing, and Cytogenomic Methods to Characterize Complex Structural Rearrangements in Acute Myeloid Leukemia
Source: MDPI journal article supplement (doi:10.3390/biomedicines12030598), 2024-03-07
Supplement: s1 [file s1]

**Supplementary Table S1: The crRNAs sequences used in this study.**

| ID | IDT #               | Position | Strand | Sequence              | PAM | Target range location    |
|----|---------------------|----------|--------|-----------------------|-----|--------------------------|
| 1  | CD.Cas9.DDMP4713.AB | 913      | +      | TACTGACTCAATCTAACATC  | TGG | chr3:100598997-100599996 |
| 2  | CD.Cas9.JLLC0695.AC | 629      | -      | TCAAGACTGTCTGACCGGCT  | GGG | chr3:104891716-104892715 |
| 3  | CD.Cas9.NXBW1374.AA | 187      | +      | ACTAGTTCATAAAAAGGCTAC | AGG | chr3:105474196-105475195 |
| 4  | CD.Cas9.VYHR2733.AA | 843      | -      | CGTTAGGTGCAACTAACACC  | AGG | chr3:113371011-113372010 |
| 5  | CD.Cas9.GBHY8639.AC | 753      | +      | TAATGCAATCGCAAGTCTGG  | TGG | chr3:113493648-113494647 |
| 6  | CD.Cas9.CJVF1523.AA | 6        | -      | CGACAACCCACTACCTGCAA  | AGG | chr3:115544892-115545891 |
| 7  | CD.Cas9.FBLB1643.AA | 183      | +      | CACGATATGGCTCCTTACAC  | TGG | chr3:115702434-115703433 |
| 8  | CD.Cas9.PBGN2758.AH | 672      | -      | CTGATATTTAAACCTACTGC  | AGG | chr3:116841289-116842288 |
| 9  | CD.Cas9.NJCX3562.AA | 398      | -      | CTCATAACTGGACCTATATT  | TGG | chr3:118282298-118283297 |
| 10 | CD.Cas9.KLJK8708.AC | 114      | +      | TGCAATAGGTCTTGACTCAC  | AGG | chr3:118527692-118528691 |
| 11 | CD.Cas9.QFFJ3076.AB | 361      | -      | AACCACAATTGCCTGTACAT  | GGG | chr3:119434301-119435300 |
| 12 | CD.Cas9.STVN5245.AA | 674      | +      | GATTATTTAGGCTAACGTAG  | TGG | chr3:121927055-121928054 |
| 13 | CD.Cas9.ZJGX3218.AA | 128      | -      | AGAGTCGGGCACCATCCTGA  | AGG | chr3:122640824-122641823 |
| 14 | CD.Cas9.PRYS9418.AF | 161      | +      | GACAAAGGCACGGTGCCTGT  | AGG | chr3:125681874-125682873 |
| 15 | CD.Cas9.BKBF0238.AA | 245      | -      | GGACGGGCCTAAGAACCATG  | GGG | chr3:125845982-125846981 |
| 16 | CD.Cas9.QNPR7457.AB | 192      | +      | CAAACCACGATAATTGTGTA  | AGG | chr3:125897367-125898366 |
| 17 | CD.Cas9.KVZG6545.AC | 510      | -      | AGGCACATTTGACCCACCTC  | TGG | chr3:126254507-126255506 |
| 18 | CD.Cas9.HJFP3604.AD | 307      | +      | ATTACGTCAACCCATAAGGT  | GGG | chr3:126256356-126257355 |
| 19 | CD.Cas9.CBWD4698.AA | 111      | -      | CACGGGTTTAAACCACAATA  | AGG | chr3:126441249-126442248 |
| 20 | CD.Cas9.RPJQ0683.AB | 957      | +      | AATCTGCTCCAAGCGTGGAT  | GGG | chr3:127406753-127407752 |
| 21 | CD.Cas9.BFJL6275.AA | 124      | -      | TGGACCTGCAAGTTTGTAGT  | TGG | chr7:62013222-62014221   |
| 22 | CD.Cas9.SPDX4659.AK | 817      | +      | TGGCTCACTCATACCAGGTG  | TGG | chr7:62575770-62576769   |
| 23 | CD.Cas9.VWBZ7809.AF | 823      | -      | TTTAGTTCGGCAATTTCTAC  | TGG | chr7:63432015-63433014   |
| 24 | CD.Cas9.PPVK4627.AA | 751      | +      | TTTATCAAGCCGACATAACA  | AGG | chr7:68268995-68269994   |
| 25 | CD.Cas9.BNVQ1853.AC | 429      | -      | CCATGAGGAAACTCCATTAA  | AGG | chr7:68505051-68506050   |
| 26 | CD.Cas9.XJCJ9825.AA | 896      | +      | GTTCTATACTGAGATGTGC   | TGG | chr7:69242026-69243025   |
| 27 | CD.Cas9.DSSQ6504.AE | 224      | -      | ACTCCATTTATCAAGGTTAC  | AGG | chr7:69438048-69439047   |
| 28 | CD.Cas9.FHJW9791.AB | 236      | +      | CAAGAAGTGAGTCGTTGCAT  | AGG | chr7:69470821-69471820   |
| 29 | CD.Cas9.NRPK8963.AB | 236      | +      | CAAGAAGTGAGTCGTTGCAT  | AGG | chr7:69470821-69471820   |
| 30 | CD.Cas9.MKWZ0913.AA | 600      | +      | AGGCTGTCGTGTCAACCCAA  | AGG | chr7:70992375-70993374   |

\* IDT=Integrated DNA technologies, Coralville, IA, USA. The Target range location is based on the hg19 (GRCh37) genome assembly.

Supplementary Table S2: Genome-wide SNP microarray data.

|                                                                                                                                  |                                                           | Bkpts            | Abnormality                                               | Start (Approximate) | End (Approximate) |                                           |             |                   |                       |             |             |             |             |           |
|----------------------------------------------------------------------------------------------------------------------------------|-----------------------------------------------------------|------------------|-----------------------------------------------------------|---------------------|-------------------|-------------------------------------------|-------------|-------------------|-----------------------|-------------|-------------|-------------|-------------|-----------|
| Chromoanagenesis                                                                                                                 | }                                                         | 1pter to p32.3   | Gain                                                      | 1                   | 50,700,000        | Terminal                                  |             |                   |                       |             |             |             |             |           |
|                                                                                                                                  |                                                           | 1p32.3           | Gain                                                      | 52,800,000          | 53,600,000        |                                           |             |                   |                       |             |             |             |             |           |
|                                                                                                                                  |                                                           | 1p32.2           | Gain                                                      | 57,700,000          | 58,600,000        |                                           |             |                   |                       |             |             |             |             |           |
|                                                                                                                                  |                                                           | 1p31.3           | Gain                                                      | 63,200,000          | 64,100,000        |                                           |             |                   |                       |             |             |             |             |           |
|                                                                                                                                  |                                                           | 1p13.2           | Loss                                                      | 115,300,000         | 116,000,000       |                                           |             |                   |                       |             |             |             |             |           |
|                                                                                                                                  |                                                           | 2p23.3           | Gain                                                      | 24,000,000          | 24,300,000        |                                           | Chr.        | Approximate Bkpts | Abnormality           | Start       | Stop        | Size        |             |           |
|                                                                                                                                  |                                                           | 2p23.3           | Loss                                                      | 27,100,000          | 27,300,000        |                                           | 3           | 3q12.2 to q13.31  | Loss                  | 100,712,059 | 104,778,910 | 4,066,851   |             |           |
|                                                                                                                                  |                                                           | 2p23.3           | Loss                                                      | 27,400,000          | 27,600,000        |                                           | 3           | chromothripsis    | Gain*                 | 104,890,715 | 105,476,196 | 585,481     |             |           |
|                                                                                                                                  |                                                           | 3q12.2 to q13.31 | Complex gains and losses<br>consisten with chromothripsis | 100,700,000         | 116,800,000       |                                           | 3           |                   | Gain*                 | 113,370,010 | 113,495,648 | 125,638     |             |           |
|                                                                                                                                  |                                                           | 3q13.32 to q21.3 | Complex gains and losses<br>consisten with chromothripsis | 118,300,000         | 127,600,000       |                                           | 3           |                   | Gain*                 | 115,543,891 | 115,704,434 | 160,543     |             |           |
|                                                                                                                                  |                                                           | 3q22.1           | Gain                                                      | 129,700,000         | 129,900,000       |                                           | 3           |                   | Loss                  | 115,721,099 | 116,712,193 | 991,094     |             |           |
|                                                                                                                                  |                                                           | 3q27.2           | Gain                                                      | 185,400,000         | 185,600,000       |                                           | 3           | 3q13.32 to q21.3  | Gain? - Very low freq | 118,281,297 | 118,530,692 | 249,395     |             |           |
|                                                                                                                                  |                                                           | 3q29 to qter     | Loss                                                      | 196,900,000         | 197,800,000       | Terminal                                  | 3           | chromothripsis    | Gain*                 | 119,433,300 | 121,931,055 | 2,517,755   |             |           |
|                                                                                                                                  |                                                           | 5pter to p13.3   | Loss                                                      | 1                   | 32,000,000        | Terminal                                  | 3           |                   | Gain*                 | 122,648,823 | 125,683,874 | 3,088,097   |             |           |
|                                                                                                                                  |                                                           | 5p13.2           | Loss                                                      | 38,000,000          | 39,700,000        |                                           | 3           |                   | Gain* (small in size) | 125,844,981 | 125,899,367 | 54,386      |             |           |
|                                                                                                                                  |                                                           | 5q23.1           | Gain                                                      | 119,900,000         | 120,300,000       |                                           | 3           |                   | Gain (small in size)  | 126,252,506 | 126,257,356 | 4,850       |             |           |
|                                                                                                                                  |                                                           | Chromoanagenesis | }                                                         | 5q23.1              | Gain              | 121,000,000                               | 121,500,000 |                   |                       |             | Gain        | 126,440,248 | 127,475,626 | 1,045,378 |
|                                                                                                                                  |                                                           |                  |                                                           | 5q31.1              | Loss              | 130,800,000                               | 131,900,000 |                   |                       |             |             |             |             |           |
| 5q31.2                                                                                                                           | Loss                                                      |                  |                                                           | 136,900,000         | 138,600,000       |                                           |             |                   |                       |             |             |             |             |           |
| 6p12.3 to q13                                                                                                                    | Homozygous                                                |                  |                                                           | 49,100,000          | 71,400,000        |                                           |             |                   |                       |             |             |             |             |           |
| 6q25.3                                                                                                                           | Loss                                                      |                  |                                                           | 156,400,000         | 156,900,000       |                                           | 7           | 7q11.22           | Gain*                 | 62,012,221  | 62,577,770  | 592,187     |             |           |
| 6q25.3                                                                                                                           | Loss                                                      |                  |                                                           | 157,500,000         | 158,000,000       |                                           | 7           | chromothripsis    | Gain*                 | 63,431,014  | 68,270,995  | 4,839,981   |             |           |
| 7p12.2 to q11.22                                                                                                                 | Complex gains and losses<br>consisten with chromothripsis |                  |                                                           | 61,900,000          | 70,000,000        |                                           | 7           |                   | Gain*                 | 68,504,050  | 69,244,026  | 739,976     |             |           |
| 7q21.11 to q26.3                                                                                                                 | Loss                                                      |                  |                                                           | 86,200,000          | 159,100,000       |                                           | 7           |                   | Gain                  | 69,437,047  | 69,472,821  | 35,774      |             |           |
| 16q11.2 to q24.1                                                                                                                 | Loss                                                      |                  |                                                           | 46,500,000          | 86,300,000        |                                           | 7           |                   | Loss                  | 69,475,046  | 69,649,683  | 174,637     |             |           |
| 16q24.3 to qter                                                                                                                  | Loss                                                      |                  |                                                           | 89,500,000          | 90,300,000        | Terminal                                  |             |                   | Loss                  | 71,000,614  | 71,918,506  | 917,892     |             |           |
| 17pter to p11.2                                                                                                                  | Loss                                                      |                  |                                                           | 1                   | 19,100,000        | Terminal                                  |             |                   |                       |             |             |             |             |           |
| 17q11.1 to q12                                                                                                                   | Abnormal (low level mosaic)                               |                  |                                                           | 25,160,000          | 37,500,000        | Very low level mosaicism- only slightly w |             |                   |                       |             |             |             |             |           |
| 20q11.23 to q13.13                                                                                                               | Loss                                                      |                  |                                                           | 35,300,000          | 49,200,000        |                                           |             |                   |                       |             |             |             |             |           |
| XY characteristic of Male Genotype                                                                                               |                                                           |                  |                                                           |                     |                   |                                           |             |                   |                       |             |             |             |             |           |
| *Majority of Losses seem to be at a frequency of ~75-85%; Frequency of gains are not able to be accurately approximated visually |                                                           |                  |                                                           |                     |                   |                                           |             |                   |                       |             |             |             |             |           |

The SNP microarray data was based on the hg19 (GRCh37) genome assembly.

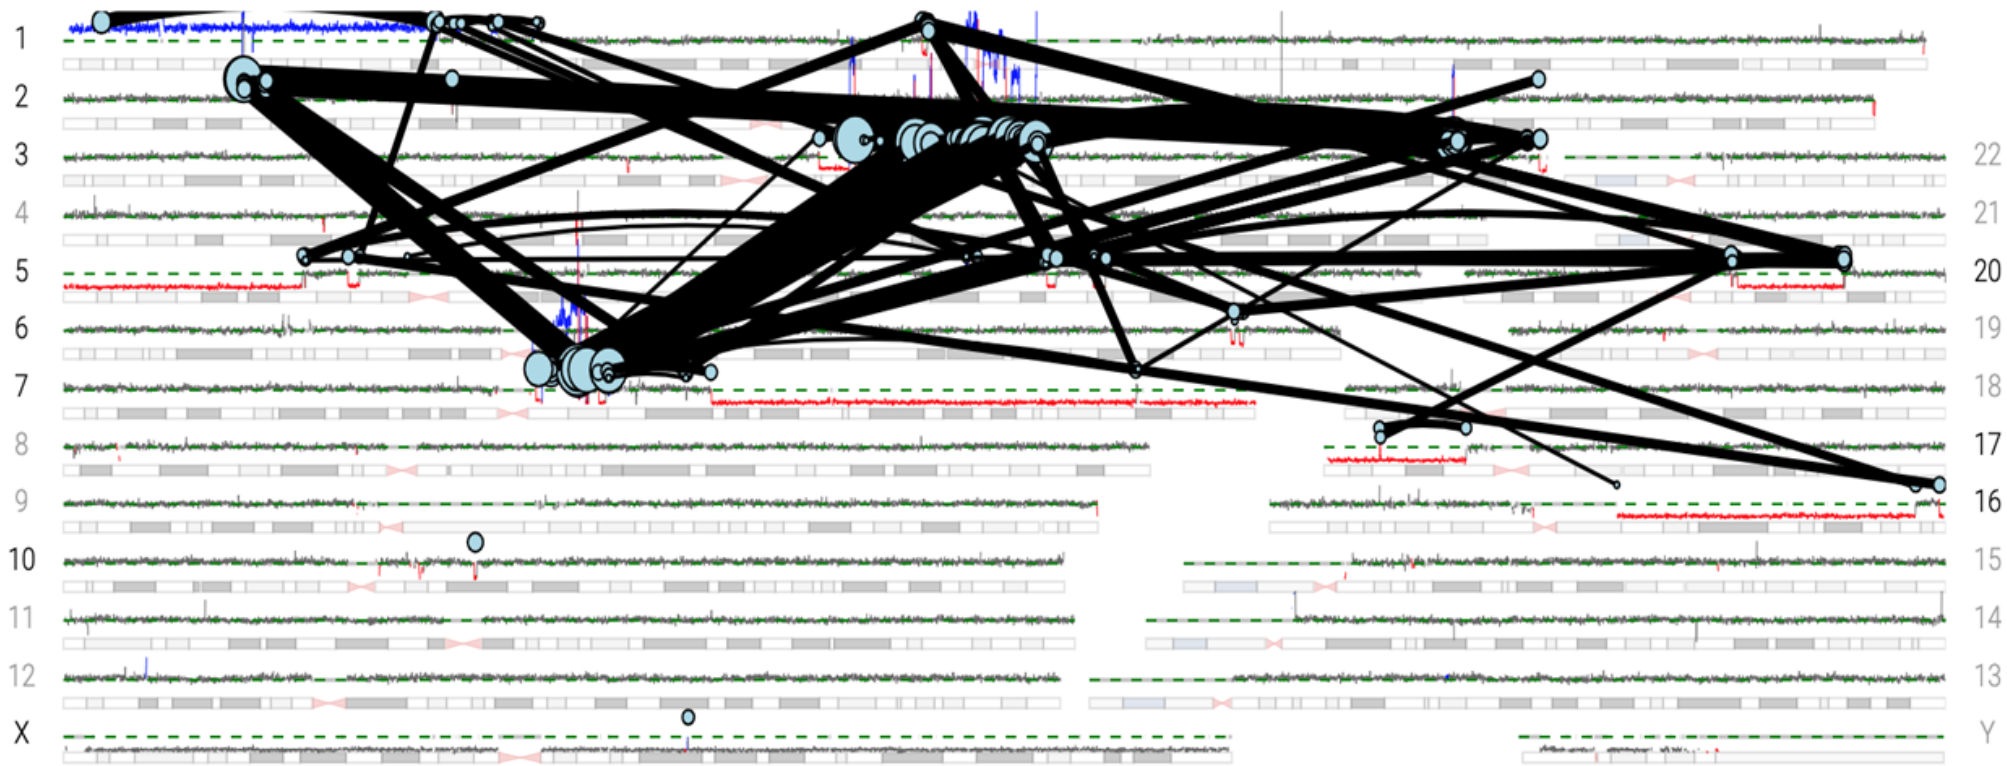

Supplementary Figure S1: Genome-wide plot of mate pair sequencing. Black lines show rearrangements, blue lines are gains/amplifications, and red lines are losses.

**Supplementary Table S3: Mate pair sequencing data involving chromosomes 2, 3, and 7.**

| ID | ChrA | ChrB | PosA      | PosB      | LocusA  | LocusB  | GeneA     | GeneA Strand | GeneB     | GeneB strand | Gene prediction            |
|----|------|------|-----------|-----------|---------|---------|-----------|--------------|-----------|--------------|----------------------------|
| 1  | 2    | 2    | 24176453  | 27091102  | 2p23.3  | 2p23.3  | FAM228A   | +            | KHK       | +            |                            |
| 2  | 2    | 2    | 26599130  | 27332156  | 2p23.3  | 2p23.3  | CIB4      | -            | GTF3C2    | -            | fusion GTF3C2->CIB4        |
| 3  | 2    | 2    | 51937034  | 52000037  | 2p16.3  | 2p16.3  | LOC730100 | +            | LOC730100 | +            |                            |
| 4  | 2    | 3    | 24108735  | 185641841 | 2p23.3  | 3q27.2  | FAM228B   | +            | IGF2BP2   | -            |                            |
| 5  | 2    | 3    | 26824472  | 184932817 | 2p23.3  | 3q27.2  | no_gene   | NA           | VPS8      | +            | truncation noGene->VPS8    |
| 6  | 2    | 3    | 24124069  | 195494223 | 2p23.3  | 3q29    | FAM228B   | +            | no_gene   | NA           | truncation FAM228B->noGene |
| 7  | 2    | 3    | 24162985  | 195523738 | 2p23.3  | 3q29    | FAM228B   | +            | PPP1R2    | -            |                            |
| 8  | 2    | 3    | 27143574  | 197217638 | 2p23.3  | 3q29    | no_gene   | NA           | DLG1      | -            | truncation DLG1->noGene    |
| 9  | 2    | 7    | 23842879  | 69782018  | 2p23.3  | 7q11.22 | ATAD2B    | -            | AUTS2     | +            |                            |
| 10 | 2    | 7    | 24175563  | 70186455  | 2p23.3  | 7q11.22 | FAM228A   | +            | AUTS2     | +            | fusion FAM228A->AUTS2      |
| 11 | 2    | 7    | 26600038  | 71276606  | 2p23.3  | 7q11.22 | CIB4      | -            | GALNT17   | +            | fusion CIB4->GALNT17       |
| 12 | 2    | 7    | 23843471  | 83249803  | 2p23.3  | 7q21.11 | ATAD2B    | -            | no_gene   | NA           | truncation noGene->ATAD2B  |
| 13 | 2    | 7    | 24124701  | 83226322  | 2p23.3  | 7q21.11 | FAM228B   | +            | no_gene   | NA           | truncation noGene->FAM228B |
| 14 | 2    | 7    | 26893424  | 83264026  | 2p23.3  | 7q21.11 | DPYSL5    | +            | no_gene   | NA           | truncation DPYSL5->noGene  |
| 15 | 2    | 7    | 197253508 | 66603932  | 2q33.1  | 7q11.21 | ANKRD44   | -            | no_gene   | NA           | truncation noGene->ANKRD44 |
| 16 | 3    | 3    | 100992219 | 116994946 | 3q12.2  | 3q13.31 | ABI3BP    | -            | no_gene   | NA           | truncation noGene->ABI3BP  |
| 17 | 3    | 3    | 105065526 | 115999831 | 3q13.11 | 3q13.31 | no_gene   | NA           | LSAMP     | -            | truncation noGene->LSAMP   |
| 18 | 3    | 3    | 105767086 | 122796155 | 3q13.11 | 3q21.1  | CBLB      | -            | SLC49A4   | +            |                            |
| 19 | 3    | 3    | 115830085 | 120679688 | 3q13.31 | 3q13.33 | LSAMP     | -            | HGD       | -            | fusion HGD->LSAMP          |
| 20 | 3    | 3    | 113789209 | 122823427 | 3q13.31 | 3q21.1  | ATP6V1A   | +            | SLC49A4   | +            |                            |
| 21 | 3    | 3    | 113776640 | 126531069 | 3q13.31 | 3q21.3  | ATP6V1A   | +            | C3orf22   | -            | fusion C3orf22->ATP6V1A    |
| 22 | 3    | 3    | 113640674 | 126710079 | 3q13.2  | 3q21.3  | no_gene   | NA           | CHCHD6    | +            | truncation noGene->CHCHD6  |
| 23 | 3    | 3    | 115819999 | 125950859 | 3q13.31 | 3q21.2  | LSAMP     | -            | no_gene   | NA           | truncation LSAMP->noGene   |
| 24 | 3    | 3    | 120838373 | 121057786 | 3q13.33 | 3q13.33 | LINC02049 | -            | STXBP5L   | +            |                            |
| 25 | 3    | 3    | 115820115 | 126709599 | 3q13.31 | 3q21.3  | LSAMP     | -            | CHCHD6    | +            |                            |
| 26 | 3    | 3    | 119714040 | 122933937 | 3q13.33 | 3q21.1  | MAATS1    | +            | SEMA5B    | -            | fusion SEMA5B->MAATS1      |
| 27 | 3    | 3    | 120668518 | 122055860 | 3q13.33 | 3q13.33 | HGD       | -            | CD86      | +            |                            |
| 28 | 3    | 3    | 122233504 | 125950401 | 3q21.1  | 3q21.2  | CASR      | +            | no_gene   | NA           | truncation CASR->noGene    |
| 29 | 3    | 3    | 121735209 | 126937593 | 3q13.33 | 3q21.3  | GOLGB1    | -            | CHCHD6    | +            | fusion GOLGB1->CHCHD6      |
| 30 | 3    | 3    | 125975069 | 126144322 | 3q21.2  | 3q21.3  | ROPN1B    | +            | ALDH1L1   | -            | fusion ROPN1B->ALDH1L1     |
| 31 | 3    | 3    | 125950869 | 126707958 | 3q21.2  | 3q21.3  | no_gene   | NA           | CHCHD6    | +            | truncation noGene->CHCHD6  |
| 32 | 3    | 3    | 127759498 | 130110454 | 3q21.3  | 3q22.1  | MGLL      | -            | FAM86HP   | -            |                            |
| 33 | 3    | 3    | 127841422 | 185641682 | 3q21.3  | 3q27.2  | no_gene   | NA           | IGF2BP2   | -            | truncation noGene->IGF2BP2 |
| 34 | 3    | 3    | 127757496 | 185894322 | 3q21.3  | 3q27.2  | MGLL      | -            | no_gene   | NA           | truncation MGLL->noGene    |
| 35 | 3    | 3    | 127966149 | 186702647 | 3q21.3  | 3q27.3  | KBTBD12   | +            | no_gene   | NA           | truncation KBTBD12->noGene |
| 36 | 3    | 3    | 130110492 | 185894391 | 3q22.1  | 3q27.2  | FAM86HP   | -            | no_gene   | NA           | truncation noGene->FAM86HP |
| 37 | 3    | 3    | 129923029 | 197196935 | 3q22.1  | 3q29    | no_gene   | NA           | DLG1      | -            | truncation noGene->DLG1    |
| 38 | 3    | 3    | 186247721 | 186703274 | 3q27.2  | 3q27.3  | DGKG      | -            | no_gene   | NA           | truncation noGene->DGKG    |
| 39 | 3    | 3    | 186248185 | 195553109 | 3q27.2  | 3q29    | DGKG      | -            | no_gene   | NA           | truncation DGKG->noGene    |
| 40 | 3    | 3    | 195524772 | 197217356 | 3q29    | 3q29    | PPP1R2    | -            | DLG1      | -            | fusion PPP1R2->DLG1        |
| 41 | 3    | 7    | 113770973 | 68819537  | 3q13.31 | 7q11.22 | ATP6V1A   | +            | no_gene   | NA           | truncation ATP6V1A->noGene |
| 42 | 3    | 7    | 113788574 | 68806912  | 3q13.31 | 7q11.22 | ATP6V1A   | +            | no_gene   | NA           | truncation ATP6V1A->noGene |
| 43 | 3    | 7    | 120840939 | 64772810  | 3q13.33 | 7q11.21 | no_gene   | NA           | no_gene   | NA           |                            |
| 44 | 3    | 7    | 121057437 | 65186429  | 3q13.33 | 7q11.21 | STXBP5L   | +            | INTS4P1   | +            | fusion STXBP5L->INTS4P1    |
| 45 | 3    | 7    | 121185065 | 65214917  | 3q13.33 | 7q11.21 | STXBP5L   | +            | INTS4P1   | +            | fusion STXBP5L->INTS4P1    |
| 46 | 3    | 7    | 118816864 | 67734630  | 3q13.32 | 7q11.22 | no_gene   | NA           | no_gene   | NA           |                            |
| 47 | 3    | 7    | 122105372 | 65022821  | 3q13.33 | 7q11.21 | CD86      | +            | no_gene   | NA           | truncation CD86->noGene    |
| 48 | 3    | 7    | 122056438 | 66695938  | 3q13.33 | 7q11.21 | CD86      | +            | RABGEF1   | +            | fusion RABGEF1->CD86       |
| 49 | 3    | 7    | 124384374 | 65212653  | 3q21.2  | 7q11.21 | KALRN     | +            | INTS4P1   | +            |                            |
| 50 | 3    | 7    | 121045503 | 68782233  | 3q13.33 | 7q11.22 | STXBP5L   | +            | no_gene   | NA           | truncation noGene->STXBP5L |
| 51 | 3    | 7    | 122822764 | 68806396  | 3q21.1  | 7q11.22 | SLC49A4   | +            | no_gene   | NA           | truncation SLC49A4->noGene |
| 52 | 3    | 7    | 122873319 | 68810842  | 3q21.1  | 7q11.22 | SLC49A4   | +            | no_gene   | NA           | truncation noGene->SLC49A4 |
| 53 | 3    | 7    | 126920746 | 65184976  | 3q21.3  | 7q11.21 | CHCHD6    | +            | INTS4P1   | +            | fusion INTS4P1->CHCHD6     |
| 54 | 3    | 7    | 126125574 | 68722206  | 3q21.3  | 7q11.22 | ALDH1L1   | -            | no_gene   | NA           | truncation ALDH1L1->noGene |
| 55 | 3    | 7    | 126543137 | 68806186  | 3q21.3  | 7q11.22 | C3orf22   | -            | no_gene   | NA           | truncation noGene->C3orf22 |
| 56 | 3    | 7    | 127883676 | 71530453  | 3q21.3  | 7q11.22 | no_gene   | NA           | GALNT17   | +            | truncation GALNT17->noGene |
| 57 | 3    | 7    | 129924506 | 70009817  | 3q22.1  | 7q11.22 | no_gene   | NA           | AUTS2     | +            | truncation AUTS2->noGene   |
| 58 | 3    | 7    | 127757516 | 72900295  | 3q21.3  | 7q11.23 | MGLL      | -            | POM121    | +            | fusion POM121->MGLL        |
| 59 | 3    | 7    | 127841040 | 72915403  | 3q21.3  | 7q11.23 | no_gene   | NA           | POM121    | +            | truncation POM121->noGene  |
| 60 | 3    | 7    | 127883214 | 83235491  | 3q21.3  | 7q21.11 | no_gene   | NA           | no_gene   | NA           |                            |
| 61 | 3    | 7    | 184932250 | 71276233  | 3q27.2  | 7q11.22 | VPS8      | +            | GALNT17   | +            |                            |
| 62 | 3    | 7    | 197016845 | 72915877  | 3q29    | 7q11.23 | MELTF     | -            | POM121    | +            | fusion MELTF->POM121       |
| 63 | 3    | 7    | 197245041 | 72827007  | 3q29    | 7q11.23 | DLG1      | -            | TYW1B     | -            |                            |
| 64 | 3    | 7    | 130118482 | 143404806 | 3q22.1  | 7q35    | LINC02021 | +            | EPHA1     | -            | fusion EPHA1->LINC02021    |
| 65 | 7    | 7    | 63118805  | 63955133  | 7q11.21 | 7q11.21 | no_gene   | NA           | no_gene   | NA           |                            |
| 66 | 7    | 7    | 68721805  | 69036211  | 7q11.22 | 7q11.22 | no_gene   | NA           | no_gene   | NA           |                            |
| 67 | 7    | 7    | 69970218  | 72885224  | 7q11.22 | 7q11.23 | AUTS2     | +            | POM121    | +            |                            |
| 68 | 7    | 7    | 72468855  | 72956717  | 7q11.22 | 7q11.23 | no_gene   | NA           | NSUN5P2   | -            | truncation NSUN5P2->noGene |
| 69 | 7    | 7    | 71535763  | 86586652  | 7q11.22 | 7q21.11 | GALNT17   | +            | no_gene   | NA           | truncation noGene->GALNT17 |

Chr = chromosome; Pos = position; The genomic locations are based on the GRCh38 genome assembly.

**Supplementary Table S4: Structural variants involving chromosomes 2, 3, and 7 by nanopore sequencing.**

| ID                                                                         | Breakpoints of structural variants |                   |                   |                   |                   |                  | chrRNA | Copy number variants                                        | Exon, intron, intergenic regions                                                                                  |
|----------------------------------------------------------------------------|------------------------------------|-------------------|-------------------|-------------------|-------------------|------------------|--------|-------------------------------------------------------------|-------------------------------------------------------------------------------------------------------------------|
|                                                                            | Chr.                               | Genomic location  |                   |                   |                   |                  |        |                                                             |                                                                                                                   |
| 1                                                                          | 3                                  | chr3:100,599,929  | chr3:100,626,019  |                   |                   |                  | 1      | Gain                                                        | Intron ( <i>ABI3BP</i> )                                                                                          |
| 2                                                                          | 3                                  | chr3:104,858,021  | chr3:104,892,347  | chr3:104,908,408  |                   |                  | 2      | Gain, amplification                                         | Intergenic                                                                                                        |
| 3*                                                                         | 3                                  | chr3:105,412,208  | chr3:105,474,400  | chr3:105,486,522* |                   |                  | 3      | Gain, amplification                                         | Intron ( <i>CBLB</i> )                                                                                            |
| 4                                                                          | 3                                  | chr3:105,966,313  | chr3:105,966,666  |                   |                   |                  |        | Loss                                                        | Intergenic                                                                                                        |
| 5*                                                                         | 3                                  | chr3:113,359,485* | chr3:113,371,858  | chr3:113,374,867  |                   |                  | 4      | Loss, gain, gain                                            | Intergenic, exon ( <i>USF3</i> ), exon ( <i>USF3</i> )                                                            |
| 6*                                                                         | 3                                  | chr3:113,494,388* | chr3:113,508,181* |                   |                   |                  | 5      | Gain, loss                                                  | Intron ( <i>ATP6V1A</i> )                                                                                         |
| 7                                                                          | 3                                  | chr3:115,167,760  | chr3:115,167,828  |                   |                   |                  |        | Loss                                                        | Intergenic                                                                                                        |
| 8*                                                                         | 3                                  | chr3:115,538,739* | chr3:115,544,900* |                   |                   |                  | 6      | Loss, gain, amplification                                   | Intron ( <i>LSAMP</i> )                                                                                           |
| 9*                                                                         | 3                                  | chr3:115,674,519  | chr3:115,702,634  | chr3:115,718,859* |                   |                  | 7      | Gain, gain, loss                                            | Intron ( <i>LSAMP</i> )                                                                                           |
| 10                                                                         | 3                                  | chr3:116,746,814  | chr3:116,769,363  |                   |                   |                  |        | Normal                                                      | Intergenic                                                                                                        |
| 11                                                                         | 3                                  | chr3:116,821,197  | chr3:116,841,964  | chr3:116,849,099  |                   |                  | 8      | Normal                                                      | Intergenic                                                                                                        |
| 12                                                                         | 3                                  | chr3:118,252,153  | chr3:118,281,575  | chr3:118,281,817  | chr3:118,282,696  | chr3:118,291,381 | 9      | Normal                                                      | Intron ( <i>NR_135547.1</i> )                                                                                     |
| 13*                                                                        | 3                                  | chr3:119,401,320  | chr3:119,432,884* | chr3:119,434,664  |                   |                  | 11     | Normal, gain                                                | Intergenic, intron ( <i>CFAP91</i> ), intron ( <i>CFAP91</i> )                                                    |
| 14*                                                                        | 3                                  | chr3:121,890,413  | chr3:121,927,745  | chr3:121,952,434* |                   |                  | 12     | Gain, amplification, gain, loss                             | Intergenic, intron, ( <i>CASR</i> ), intron ( <i>CASR</i> )                                                       |
| 15*                                                                        | 3                                  | chr3:122,515,022* | chr3:122,542,323* |                   |                   |                  |        | Amplification, loss                                         | Intron ( <i>SLC49A4</i> )                                                                                         |
| 16*                                                                        | 3                                  | chr3:122,592,305* | chr3:122,611,656  | chr3:122,640,962  | chr3:122,652,788* | chr3:122,681,826 | 13     | Normal, gain, normal, gain, normal                          | Intron ( <i>SLC49A4</i> ), intergenic, exon ( <i>SEMA5B</i> ), intron ( <i>SEMA5B</i> ), intron ( <i>SEMA5B</i> ) |
| 17                                                                         | 3                                  | chr3:123,664,618  | chr3:123,716,995  |                   |                   |                  |        | Gain                                                        | Intron ( <i>CCDC14</i> ), intergenic                                                                              |
| 18*                                                                        | 3                                  | chr3:125,624,678  | chr3:125,669,270* | chr3:125,669,766* | chr3:125,672,194  |                  |        | Gain, amplification                                         | Intergenic, intron ( <i>ALG1L</i> ), intron ( <i>ALG1L</i> ), intron ( <i>ALG1L</i> )                             |
| 19*                                                                        | 3                                  | chr3:125,675,646  | chr3:125,682,047  | chr3:125,694,156* |                   |                  | 14     | Gain, amplification, gain, amplification, normal            | Intron ( <i>ALG1L</i> )                                                                                           |
| 20*                                                                        | 3                                  | chr3:125,844,441* | chr3:125,846,229  | chr3:125,863,212* |                   |                  | 15     | Gain, amplification                                         | Intron ( <i>ALDIH1</i> )                                                                                          |
| 21                                                                         | 3                                  | chr3:125,897,574  | chr3:125,922,069  |                   |                   |                  | 16     | Normal                                                      | Intron ( <i>ALDIH1</i> )                                                                                          |
| 22*                                                                        | 3                                  | chr3:126,249,843* | chr3:126,255,019  |                   |                   |                  | 17     | Normal                                                      | Intron ( <i>CHST13</i> )                                                                                          |
| 23*                                                                        | 3                                  | chr3:126,256,677  | chr3:126,258,740  | chr3:126,262,047* |                   |                  | 18     | Normal                                                      | Intron ( <i>CHST13</i> ), intron ( <i>CHST13</i> ), exon ( <i>CHST13</i> )                                        |
| 24*                                                                        | 3                                  | chr3:126,424,358  | chr3:126,424,702  | chr3:126,426,808* | chr3:126,428,508* |                  |        | Normal                                                      | Intron ( <i>CHCHD6</i> )                                                                                          |
| 25*                                                                        | 3                                  | chr3:126,428,828* | chr3:126,441,362  |                   |                   |                  | 19     | Gain                                                        | Intron ( <i>CHCHD6</i> )                                                                                          |
| 26*                                                                        | 3                                  | chr3:127,383,619  | chr3:127,407,727  | chr3:127,476,304* |                   |                  | 20     | Normal, gain, normal                                        | Intron ( <i>PODXL2</i> ), intron ( <i>MGLL</i> ), intron ( <i>MGLL</i> )                                          |
| 27*                                                                        | 3                                  | chr3:127,602,417* | chr3:127,639,712  |                   |                   |                  |        | Normal                                                      | Intergenic, intron ( <i>KBTBD12</i> )                                                                             |
| 28*                                                                        | 3                                  | chr3:129,643,392* | chr3:129,690,495  |                   |                   |                  |        | Gain                                                        | Intergenic                                                                                                        |
| 29                                                                         | 7                                  | chr7:317,478      | chr7:336,683      | chr7:337,238      | chr7:342,677      |                  |        | Normal                                                      | Intergenic                                                                                                        |
| 30                                                                         | 7                                  | chr7:61,968,673   | chr7:61,969,730   | chr7:62,020,349   |                   |                  | 21     | Normal, normal, gain, amplification                         | Intergenic                                                                                                        |
| 31*                                                                        | 7                                  | chr7:63,415,194*  | chr7:63,435,841   | chr7:63,451,382   |                   |                  | 23     | Loss, gain, gain                                            | Intergenic                                                                                                        |
| 32*                                                                        | 7                                  | chr7:68,160,491   | chr7:68,187,000*  | chr7:68,187,235*  | chr7:68,226,475   | chr7:68,268,667  | 24     | normal, gain, loss, gain, normal, amplification, loss, gain | Intergenic                                                                                                        |
|                                                                            |                                    | chr7:68,271,287*  | chr7:68,271,421*  | chr7:68,271,991*  |                   |                  |        |                                                             |                                                                                                                   |
| 33*                                                                        | 7                                  | chr7:68,500,503*  | chr7:68,505,483   |                   |                   |                  | 25     | Gain                                                        | Intergenic                                                                                                        |
| 34*                                                                        | 7                                  | chr7:69,202,729   | chr7:69,242,939   | chr7:69,246,688*  |                   |                  | 26     | Gain, normal                                                | Intron ( <i>AUTS2</i> )                                                                                           |
| 35*                                                                        | 7                                  | chr7:69,435,177*  | chr7:69,438,275   | chr7:69,468,534   | chr7:69,469,200   |                  | 27     | Gain, normal, gain                                          | Intron ( <i>AUTS2</i> )                                                                                           |
| 36*                                                                        | 7                                  | chr7:69,471,074   | chr7:69,474,861*  |                   |                   |                  | 28/29  | Gain, loss                                                  | Intron ( <i>AUTS2</i> )                                                                                           |
| 37*                                                                        | 7                                  | chr7:70,992,992   | chr7:70,995,713*  | chr7:71,005,705   | chr7:71,006,139   |                  | 30     | Normal, loss, loss, loss                                    | Intron ( <i>GALNT17</i> )                                                                                         |
| 38*                                                                        | 7                                  | chr7:72,355,740*  | chr7:72,370,519*  |                   |                   |                  |        | Normal                                                      | Intron ( <i>POM121</i> )                                                                                          |
| 39*                                                                        | 2                                  | chr2:24,065,657*  | chr2:24,069,092   | chr2:24,069,719   | chr2:24,093,039   |                  |        | Gain, normal, amplification                                 | Intron ( <i>ATAD2B</i> )                                                                                          |
| 40                                                                         | 2                                  | chr2:109,815,783  | chr2:109,816,313  |                   |                   |                  |        | Gain                                                        | Intron ( <i>SH3RF3</i> )                                                                                          |
| 41                                                                         | 2                                  | chr2:190,907,264  | chr2:190,932,292  | chr2:190,946,998  |                   |                  |        | Normal                                                      | Intergenic                                                                                                        |
| * breakpoint detected by both Mate Pair sequencing and nanopore sequencing |                                    |                   |                   |                   |                   |                  |        |                                                             |                                                                                                                   |

\* breakpoint detected by both Mate Pair sequencing and nanopore sequencing

The Genomic locations are based on the hg19 (GRCh37) genome assembly.

**Supplementary Table S5: DNA sequences flanking breakpoints of structural variants.**

| ID | Position       | Genomic Location  | Strand (+/-) | Intron / Exon | Name      | Family      | Class | Repeatmasker     |
|----|----------------|-------------------|--------------|---------------|-----------|-------------|-------|------------------|
| 1  | chr3:122652784 | <i>SEMA5B</i>     | -            | intron        | AluSx     | Alu         | SINE  | HAL1             |
| 2  | chr3:119432887 | <i>CFAP91</i>     | +            | intron        | L1ME4a    | L1          | LINE  | L1ME4a           |
| 3  | chr2:24066341  | <i>ATAD2B</i>     | -            | intron        | L1MEa     | L1          | LINE  | L1MEa            |
| 4  | chr2:24065749  | <i>ATAD2B</i>     | -            | intron        | L1MEa     | L1          | LINE  | L1MEa            |
| 5  | chr7:72370832  | <i>POM121</i>     | +            | intron        | L1MB4     | L1          | LINE  | L1MB4            |
| 6  | chr7:72355763  | <i>POM121</i>     | +            | intron        | L1MEc     | L1          | LINE  | L1MEc            |
| 7  | chr3:125693912 | <i>ROPN1B</i>     | +            | intron        | FRAM      | Alu         | SINE  | N/A              |
| 8  | chr3:105485930 | <i>CBLB</i>       | -            | intron        | N/A       | N/A         | N/A   | N/A              |
| 9  | chr3:121952351 | <i>CASR</i>       | +            | intron        | N/A       | N/A         | N/A   | N/A              |
| 10 | chr3:115718678 | <i>LSAMP</i>      | -            | intron        | N/A       | N/A         | N/A   | N/A              |
| 11 | chr3:115548932 | <i>LSAMP</i>      | -            | intron        | N/A       | N/A         | N/A   | N/A              |
| 12 | chr3:115538846 | <i>LSAMP</i>      | -            | intron        | N/A       | N/A         | N/A   | N/A              |
| 13 | chr3:115538962 | <i>LSAMP</i>      | -            | intron        | N/A       | N/A         | N/A   | N/A              |
| 14 | chr3:113508056 | <i>ATP6V1A</i>    | +            | intron        | AluSq     | Alu         | SINE  | N/A              |
| 15 | chr3:113495487 | <i>ATP6V1A</i>    | +            | intron        | N/A       | N/A         | N/A   | N/A              |
| 16 | chr3:113507421 | <i>ATP6V1A</i>    | +            | intron        | AluSq2    | Alu         | SINE  | N/A              |
| 17 | chr3:113489820 | <i>ATP6V1A</i>    | +            | intron        | AluSx3    | Alu         | SINE  | N/A              |
| 18 | chr3:127476339 | <i>MGLL</i>       | -            | intron        | N/A       | N/A         | N/A   | N/A              |
| 19 | chr3:127478341 | <i>MGLL</i>       | -            | intron        | N/A       | N/A         | N/A   | N/A              |
| 20 | chr3:127476359 | <i>MGLL</i>       | -            | intron        | N/A       | N/A         | N/A   | N/A              |
| 21 | chr7:69474803  | <i>AUTS2</i>      | +            | intron        | MIRc      | MIR         | SINE  | N/A              |
| 22 | chr7:69435204  | <i>AUTS2</i>      | +            | intron        | N/A       | N/A         | N/A   | N/A              |
| 23 | chr7:69247004  | <i>AUTS2</i>      | +            | intron        | MER5A     | hAT-Charlie | DNA   | N/A              |
| 24 | chr3:125863165 | <i>ALDH1L1</i>    | -            | intron        | L1MB1     | L1          | LINE  | L1MB1            |
| 25 | chr3:125844417 | <i>ALDH1L1</i>    | -            | intron        | N/A       | N/A         | N/A   | N/A              |
| 26 | chr3:126428922 | <i>CHCHD6</i>     | +            | intron        | MER58A    | hAT-Charlie | DNA   | L1MB7            |
| 27 | chr3:126428442 | <i>CHCHD6</i>     | +            | intron        | L1MB7     | L1          | LINE  | L1MB7            |
| 28 | chr3:126426801 | <i>CHCHD6</i>     | +            | intron        | L2b       | L2          | LINE  | N/A              |
| 29 | chr3:122541611 | <i>SLC49A4</i>    | +            | intron        | L2a       | L2          | LINE  | L2a              |
| 30 | chr3:122592166 | <i>SLC49A4</i>    | +            | intron        | AluSz     | Alu         | SINE  | N/A              |
| 31 | chr3:122515002 | <i>SLC49A4</i>    | +            | intron        | N/A       | N/A         | N/A   | N/A              |
| 32 | chr3:122542274 | <i>SLC49A4</i>    | +            | intron        | N/A       | N/A         | N/A   | N/A              |
| 33 | chr7:70995438  | <i>GALNT17</i>    | +            | intron        | MER5A     | hAT-Charlie | DNA   | MER5A            |
| 34 | chr7:71000748  | <i>GALNT17</i>    | +            | intron        | N/A       | N/A         | N/A   | N/A              |
| 35 | chr3:126249912 | <i>CHST13</i>     | +            | intron        | N/A       | N/A         | N/A   | N/A              |
| 36 | chr3:126261980 | <i>CHST13</i>     | +            | exon          | N/A       | N/A         | N/A   | N/A              |
| 37 | chr7:68284524  | Intergenic region | N/A          | N/A           | L3        | CR1         | LINE  | L3               |
| 38 | chr3:113359521 | Intergenic region | N/A          | N/A           | Charlie1a | hAT-Charlie | DNA   | L1MEg, Charlie1a |
| 39 | chr3:104784370 | Intergenic region | N/A          | N/A           | L1ME1     | L1          | LINE  | L1ME1            |
| 40 | chr3:127602519 | Intergenic region | N/A          | N/A           | AluSz     | Alu         | SINE  | N/A              |
| 41 | chr3:127602057 | Intergenic region | N/A          | N/A           | N/A       | N/A         | N/A   | N/A              |
| 42 | chr7:68271899  | Intergenic region | N/A          | N/A           | AluSx1    | Alu         | SINE  | N/A              |
| 43 | chr7:68247220  | Intergenic region | N/A          | N/A           | AluSp     | Alu         | SINE  | N/A              |
| 44 | chr7:68271383  | Intergenic region | N/A          | N/A           | AluSz6    | Alu         | SINE  | N/A              |
| 45 | chr7:68275829  | Intergenic region | N/A          | N/A           | AluSx     | Alu         | SINE  | N/A              |
| 46 | chr7:68187193  | Intergenic region | N/A          | N/A           | N/A       | N/A         | N/A   | N/A              |
| 47 | chr7:68271173  | Intergenic region | N/A          | N/A           | L3        | CR1         | LINE  | N/A              |
| 48 | chr7:68501198  | Intergenic region | N/A          | N/A           | N/A       | N/A         | N/A   | N/A              |
| 49 | chr7:68186792  | Intergenic region | N/A          | N/A           | AluSg7    | Alu         | SINE  | N/A              |
| 50 | chr3:125669712 | Intergenic region | N/A          | N/A           | N/A       | N/A         | N/A   | N/A              |
| 51 | chr3:129641872 | Intergenic region | N/A          | N/A           | AluSx     | Alu         | SINE  | N/A              |
| 52 | chr3:125669702 | Intergenic region | N/A          | N/A           | N/A       | N/A         | N/A   | N/A              |
| 53 | chr3:125669244 | Intergenic region | N/A          | N/A           | MLTD1     | ERV1-MaLR   | LTR   | N/A              |
| 54 | chr3:129643349 | Intergenic region | N/A          | N/A           | AluSz     | Alu         | SINE  | N/A              |
| 55 | chr7:63415511  | Intergenic region | N/A          | N/A           | N/A       | N/A         | N/A   | N/A              |

N/A: not available. The genomic locations are based on the GRCh38 genome assembly.
